# Supplementary material for: Decomposing the Poor-Non-Poor Gap in the Prevalence of Undiagnosed and Untreated Hypertension Among Bangladeshi Population
Source: PubMed Central journal article supplement (PMC11623077; doi:10.5334/gh.1372), 2024-12-05

Supplementary figure 1: Major findings

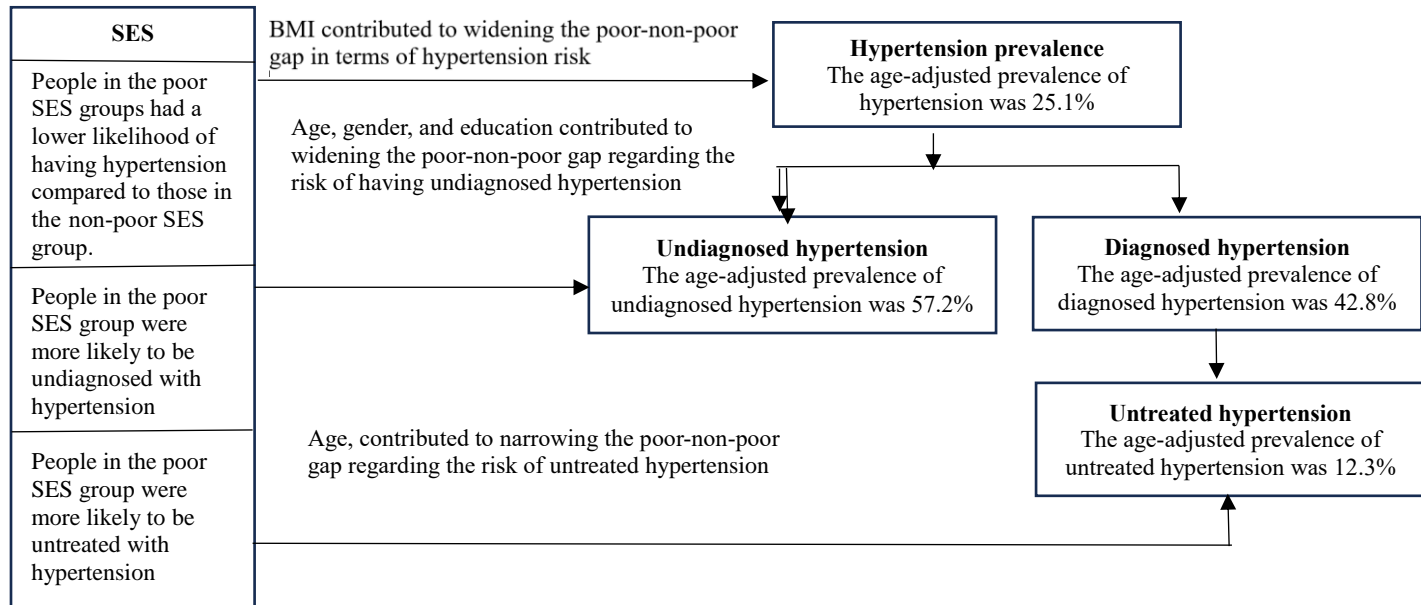

Supplement: gh-19-1-1372-s1.pdf [file gh-19-1-1372-s1.pdf]
